# Supplementary material
Source: publisher figshare collection journal article supplement (https://asha.figshare.com/articles/dataset/_/22105142)
Supplement: Supplementary file 1 [file 1]

**Supplemental Material S1.** Search strategy: terms used to search the six electronic databases.

---

((grade 1 or grade one or grade two or grade 2 or grade 3 or grade three or first grade or second grade or third grade) and student\*) or classroom or kindergarten\* or kindergarden\* or child\* or preschool\* or nursery school\*)

AND

((morphology or morphemes or morphological intervention\* or morphological awareness or morphological knowledge or morphological processing or morphological skills) and (intervene\* or instruct\* or treatment\* or therap\* or practice\* or strateg\*))

AND

(literacy or read\* or decod\*)

---
