# Supplementary material
Source: publisher figshare collection journal article supplement (https://asha.figshare.com/articles/dataset/_/22105142)
Supplement: Supplementary file 2 [file 1]

## Supplemental Material S2. Eligibility criteria for full-text review.

| Inclusion Criteria                                                                                                                                                                                                                                               | Exclusion Criteria                                                                                                                                                                                                                                                                              |
|------------------------------------------------------------------------------------------------------------------------------------------------------------------------------------------------------------------------------------------------------------------|-------------------------------------------------------------------------------------------------------------------------------------------------------------------------------------------------------------------------------------------------------------------------------------------------|
| Full-text PDF obtained and uploaded to Covidence                                                                                                                                                                                                                 | Full-text PDF record could not be located by library                                                                                                                                                                                                                                            |
| Full-text record is in English                                                                                                                                                                                                                                   | Full-text record is not in English                                                                                                                                                                                                                                                              |
| Manuscript has undergone peer review and is published in peer-reviewed journal                                                                                                                                                                                   | Manuscript has not undergone peer review; not published in peer-reviewed journal (e.g., book chapters, abstracts, conference presentations, editorials, government reports, etc.)                                                                                                               |
| Record explicitly indicates that the intended or actual recipients of the morphological intervention/instruction includes any children 4–8 years of age or kindergarten to Grade 3 students (inclusive)                                                          | Intended or actual recipients of the morphological intervention/instruction are exclusively students 9 years of age and above or in Grades 4–12                                                                                                                                                 |
| SLP and/or educator involved in the design, delivery, and/or monitoring of the intervention/instruction                                                                                                                                                          | SLP and/or educator not involved in the design, delivery, and/or monitoring of the intervention/instruction                                                                                                                                                                                     |
| Intervention/instruction occurs in an educational setting (academic pre-school, kindergarten, elementary school, specialized schools, private or public schools) and is classroom based—includes resource/special education class/group instruction/intervention | Intervention/instruction does not occur in an educational setting (e.g., university clinic, rehabilitation outpatient, community or private clinic, home, daycare) and is not classroom based                                                                                                   |
| Components of the intervention/instruction being investigated include derivational or inflectional morphology or morphological awareness                                                                                                                         | Morphology (derivational, inflectional, awareness) did not appear as a distinguishable component of the intervention/instruction                                                                                                                                                                |
| Describes an implemented or theoretical intervention or instruction and indicates how the intervention/instruction is administered                                                                                                                               | Does not describe an implemented or theoretical intervention or instruction; does not indicate how the intervention/instruction is administered; discussion is limited to development of language & literacy and/or assessment, or describes standards of practice/clinical practice guidelines |

*Note.* Language of intervention does not need to be in English, nor child’s first language. An educator is considered any member of the school team involved in day-to-day classroom instruction and/or special education/resource instruction in an elementary school, including classroom teachers, learning resource teachers, special education teachers, educational assistants, early childhood educators, etc. PDF = portable document format; SLP = speech-language pathologist.
