# Supplementary material
Source: publisher figshare collection journal article supplement (https://asha.figshare.com/articles/dataset/_/22105142)
Supplement: Supplementary file 3 [file 1]

### Supplemental Material S3. Data charting form.

| Data to be charted                                                                                                                                                       | Definition                                                                                                                                                                                                                      |
|--------------------------------------------------------------------------------------------------------------------------------------------------------------------------|---------------------------------------------------------------------------------------------------------------------------------------------------------------------------------------------------------------------------------|
| Study characteristics                                                                                                                                                    |                                                                                                                                                                                                                                 |
| Author(s)                                                                                                                                                                | Last name, first name                                                                                                                                                                                                           |
| Year published                                                                                                                                                           | —                                                                                                                                                                                                                               |
| Country                                                                                                                                                                  | Country in which the study was conducted or situated                                                                                                                                                                            |
| Funding                                                                                                                                                                  | Sources of funding for the study as reported by authors (e.g., funded by the United States Department of Education)                                                                                                             |
| Study aim                                                                                                                                                                | What was the stated aim/purpose/objective of the study                                                                                                                                                                          |
| Type of article                                                                                                                                                          | If an empirical article, indicate study design (e.g., randomised controlled trial, quasi-experimental, etc.)<br><br>If a non-empirical article, indicate if type of article is described (e.g., clinical focus, tutorial, etc.) |
| Sample size                                                                                                                                                              | Number of participants recruited for the study                                                                                                                                                                                  |
| Population characteristics                                                                                                                                               |                                                                                                                                                                                                                                 |
| Elementary grade of participants                                                                                                                                         | What elementary grade were the participants in (e.g., kindergarten to Grade 3 students)                                                                                                                                         |
| Age                                                                                                                                                                      | —                                                                                                                                                                                                                               |
| Sex/gender                                                                                                                                                               | N - female; N - male; N - girl; N - boy                                                                                                                                                                                         |
| Have any study participants been identified with oral language and/or literacy deficits or identified as being at risk of having oral language and/or literacy deficits? | As stated by the authors in reporting the characteristics of the intended or actual recipients of the morphological intervention/instruction being described                                                                    |
| Intervention                                                                                                                                                             |                                                                                                                                                                                                                                 |
| Context of the research                                                                                                                                                  | As stated by the author(s) (e.g., thesis research, university-school partnership, etc.)                                                                                                                                         |
| Context of the morphological instruction                                                                                                                                 | Where did the intervention/instruction occur (e.g., general classroom, room separate from the classroom such as a library, etc.)                                                                                                |

| Data to be charted                                                                    | Definition                                                                                                                                                                                                                                                                                                                                                                                                                                                                                                                                                                                                        |
|---------------------------------------------------------------------------------------|-------------------------------------------------------------------------------------------------------------------------------------------------------------------------------------------------------------------------------------------------------------------------------------------------------------------------------------------------------------------------------------------------------------------------------------------------------------------------------------------------------------------------------------------------------------------------------------------------------------------|
| Model of service delivery                                                             | What is the model of service delivery as stated by the author(s) (e.g., Multitiered System of Supports, Response To Intervention, etc.)                                                                                                                                                                                                                                                                                                                                                                                                                                                                           |
| Intervention format                                                                   | Was the intervention/instruction provided to individual students, small groups or the whole class; if small groups specify the number of students                                                                                                                                                                                                                                                                                                                                                                                                                                                                 |
| Aspect of language and/or literacy being investigated                                 | What are the aspects of language/literacy being investigated (e.g., morphology, phonology, vocabulary, etc.)                                                                                                                                                                                                                                                                                                                                                                                                                                                                                                      |
| Professionals involved                                                                | Who are the professionals involved in the intervention/instruction (e.g., SLP, educator/teacher, SLP-researcher, educator-researcher, etc.). An educator is considered any member of the school team involved in day-to-day classroom instruction and/or special education/resource instruction in an elementary school, including classroom teachers, learning resource teachers, special education teachers, educational assistants, early childhood educators, etc.                                                                                                                                            |
| Instruction: RTSS terms for elements of morphological instruction (Hart et al., 2017) |                                                                                                                                                                                                                                                                                                                                                                                                                                                                                                                                                                                                                   |
| Aim                                                                                   | The planned outcome from achieving one or more targets of treatment (e.g., student will decode present progressive verbs in text with comprehension)                                                                                                                                                                                                                                                                                                                                                                                                                                                              |
| Treatment component                                                                   | Description of one activity that is part of the morphological intervention (e.g., guided word sort of verbs ending with the suffix /-ing/ and ending with the suffix /-ed/)                                                                                                                                                                                                                                                                                                                                                                                                                                       |
| Target of treatment                                                                   | Specific, measurable (in principle) aspect of the student’s functioning that is predicted to be directly changed (e.g., spelling the suffix /-ing/)                                                                                                                                                                                                                                                                                                                                                                                                                                                               |
| Treatment group                                                                       | One of three groups as stated by the author(s): <ol style="list-style-type: none"> <li>organ functions treatment group: “concerned with effecting changes in the function of organs or organ systems” (Hart et al., 2017, p. 12-13)</li> <li>skills and habits group: “learning is accomplished via repetitive practice, and results in increased skillfulness and greater automaticity of the behavioural routine” (Hart et al., 2017, p. 14)</li> <li>representations group: “... intended to change cognitive and affective representations... e.g., semantic knowledge” (Hart et al., 2017, p. 15)</li> </ol> |

| Data to be charted          | Definition                                                                                                                                                                                                                                                                                                                                                                                                                                             |
|-----------------------------|--------------------------------------------------------------------------------------------------------------------------------------------------------------------------------------------------------------------------------------------------------------------------------------------------------------------------------------------------------------------------------------------------------------------------------------------------------|
| Mechanism of action         | Process by which the intervention/instruction's ingredients induce change in the target of treatment as stated by the author(s)                                                                                                                                                                                                                                                                                                                        |
| Aspect of change            | The hypothesized change in the target of treatment (e.g., increasing student knowledge of the suffix /-ing/) as stated by the author(s)                                                                                                                                                                                                                                                                                                                |
| Outcome measure             | Tool(s) used to measure the hypothesized change in the target of treatment (e.g., observe and tally the number of /-ing/ verbs correctly identified by the student, administration of a formal or researcher-developed assessment tool; performance on class work)                                                                                                                                                                                     |
| Ingredients                 | Anything the interventionist does or provides when administering the intervention/instruction (e.g., using word cards with /-ing/ verbs, teacher says "Let's see if we can find words that have /-ing/ in them"; dosage of treatment such as 4 times a week for 30 minutes for 8 weeks, etc.)                                                                                                                                                          |
| Other                       | Outcome measurement tool(s) reported for the morphological intervention as a whole                                                                                                                                                                                                                                                                                                                                                                     |
| Instruction: Collaboration  |                                                                                                                                                                                                                                                                                                                                                                                                                                                        |
| Definition of collaboration | What is the stated definition of collaboration (e.g., interprofessional practice, multidisciplinary collaboration, interdisciplinary collaboration, etc.)                                                                                                                                                                                                                                                                                              |
| Role of the SLP             | What is the stated role of the SLP in the intervention/instruction (e.g., SLP designed the intervention/instruction and coached the educator, etc.)                                                                                                                                                                                                                                                                                                    |
| Role of the educator        | What is the stated role of the educator in the intervention/instruction (e.g., educator implemented the intervention/instruction and collected student outcome data, etc.)                                                                                                                                                                                                                                                                             |
| Features of collaboration   | What are the stated descriptions of SLPs and educators interacting in the planning, delivery and/or monitoring of morphological interventions/instruction (e.g., SLP and teacher jointly discuss and define targets; SLP created a word list of affixed words containing Latin and Greek roots and shared with teacher; SLP models scaffolding techniques; teacher gathers progress monitoring data and shares student performance with the SLP, etc.) |

*Note.* RTSS = Rehabilitation Treatment Specification System; SLP = speech-language pathologist.
